# Supplementary material for: On the formation of ordered protein assemblies in cell–cell interfaces
Source: PubMed Central journal article supplement — Proc Natl Acad Sci U S A. 2022 Aug 15;119(34):e2206175119. doi: 10.1073/pnas.2206175119 (PMC9407605; doi:10.1073/pnas.2206175119), 2022-08-15
Supplement: pnas.2206175119.sapp.pdf [file pnas.2206175119.sapp.pdf]

## **Supplementary Information for**

On the formation of ordered protein assemblies in cell-cell interfaces

Nadir Boni, Lawrence Shapiro, Barry Honig, Yinghao Wu and Rotem Rubinstein

Corresponding author – Barry Honig

[bh6@columbia.edu](mailto:bh6@columbia.edu)

### **This PDF file includes:**

- Figures S1 to S5
- Table S1

# SI Figure 1

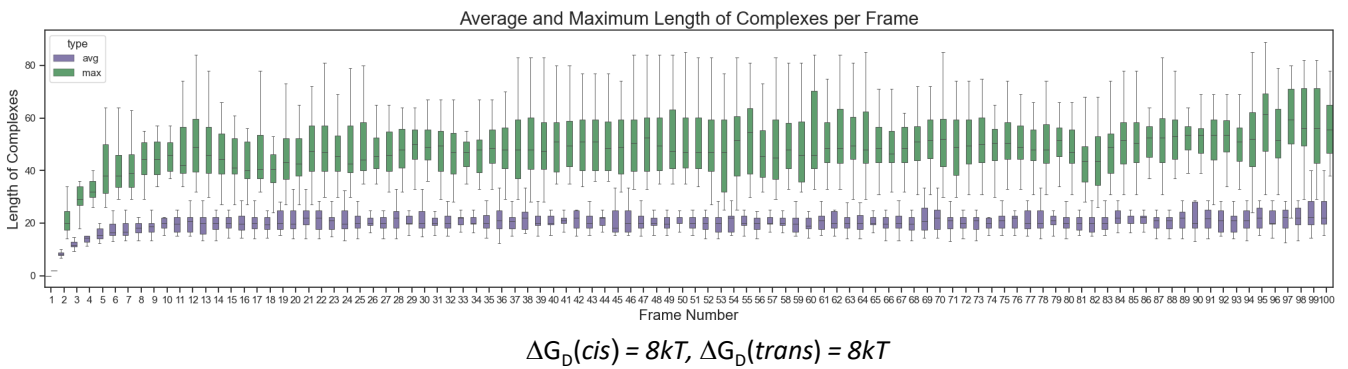

**SI Figure 1.** The simulations reach equilibrium. All simulations reached equilibrium as tested by plotting the average (purple) and maximum zipper length (green). *In this case the average and maximum are calculated for 20 simulations with the same parameters ( concentration = 4%,  $\Delta G_D(cis) = 8kT$ ,  $\Delta G_D(trans) = 8kT$  )*

## SI Figure 2

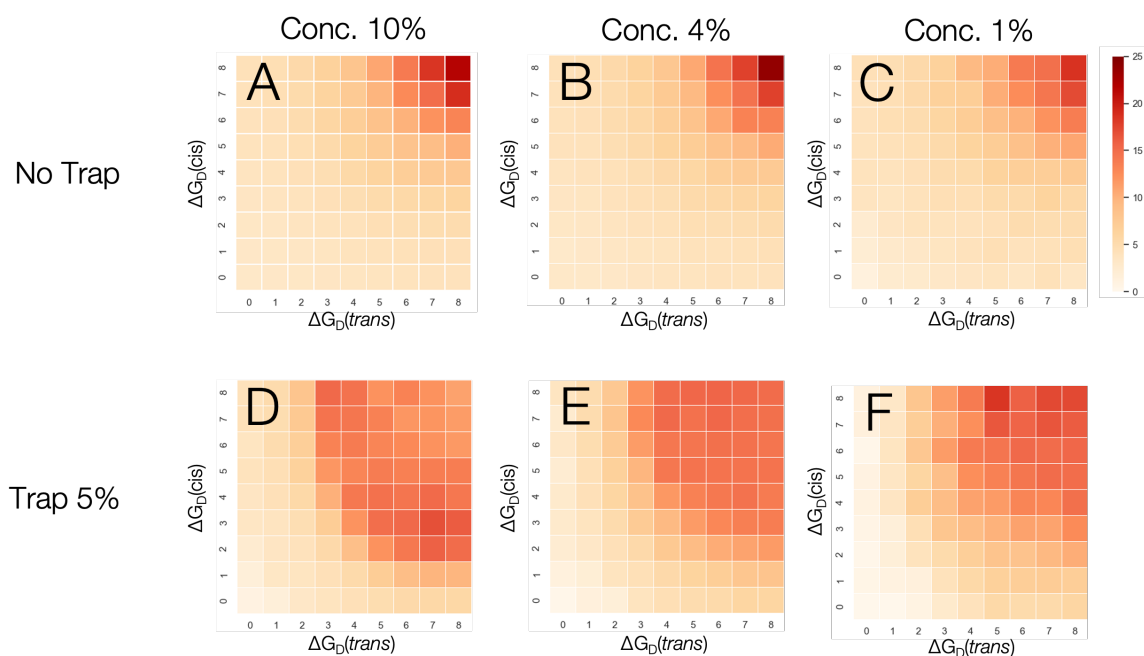

### SI 2: *cPcdhs* form long zippers whose length is affinity and concentration dependent.

Heatmaps showing the average size of zipper-like arrays at the last step of simulation using different combinations of *trans* and *cis* affinities (X and Y axis respectively), three different protein concentrations (1%, 4%, and 10%), and two different cell-cell contact areas (no trap and 5% diffusion trap). For each set of parameters, the values of the average zipper size are averaged over 20 independent simulations. The size of the zipper-like array increases with increase of affinities and protein concentration.

## SI Figure 3

A

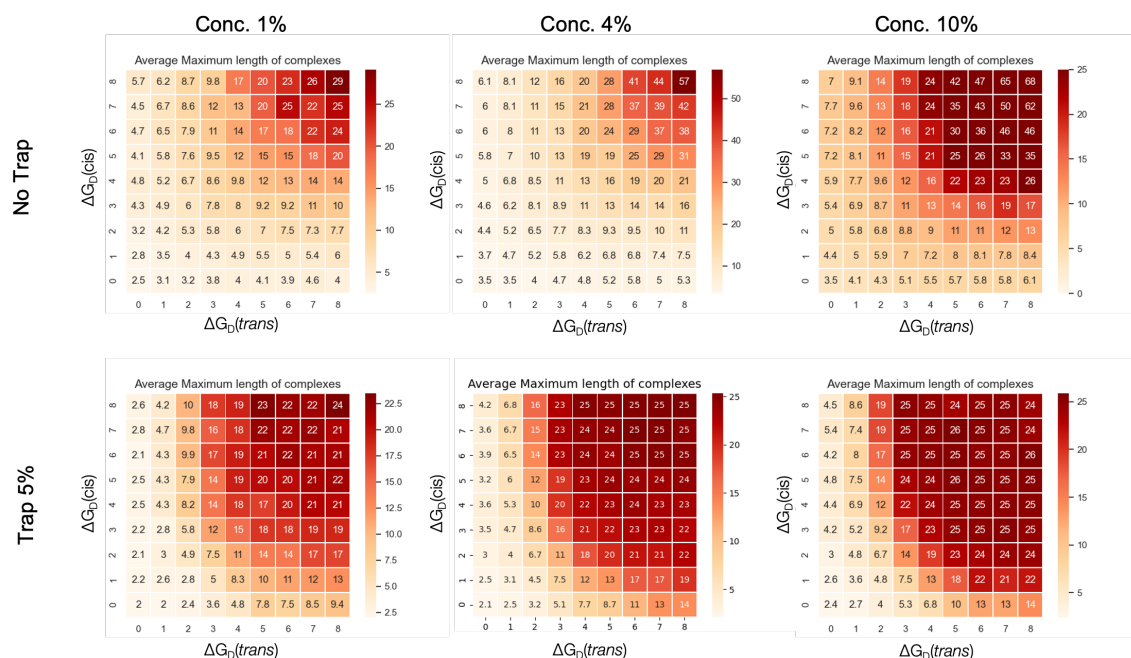

B

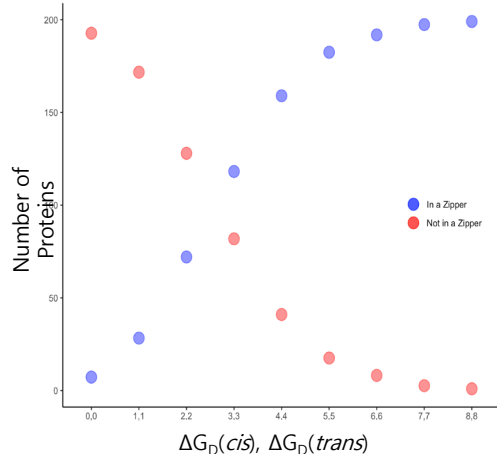

### SI Figure 3: *cPcdhs* form long zippers whose length is affinity and concentration dependent.

A) Heatmaps showing the maximum size of zipper-like arrays at the last step of simulation using different combinations of *trans* and *cis* affinities (X and Y axis respectively), three different protein concentrations (1%, 4%, and 10%), and two different cell-cell contact area (no trap and 5% diffusion trap). For each set of parameters, the values of the maximum zipper size were averaged over 20 independent simulations. B) The Number of *cPcdhs* that are in zippers (blue) and are not in zippers (red) was counted at the last step of simulations with nine different combinations of *cis* and *trans* affinities (x-axis). Protein concentration in each simulation was 4% of the total grid size (200 proteins in total). When *cis* and *trans* affinities are both at least moderate ( $\Delta G_D \geq 3kT$  for both) the majority of *cPcdhs* are part of zipper like assemblies.

## SI Figure 4

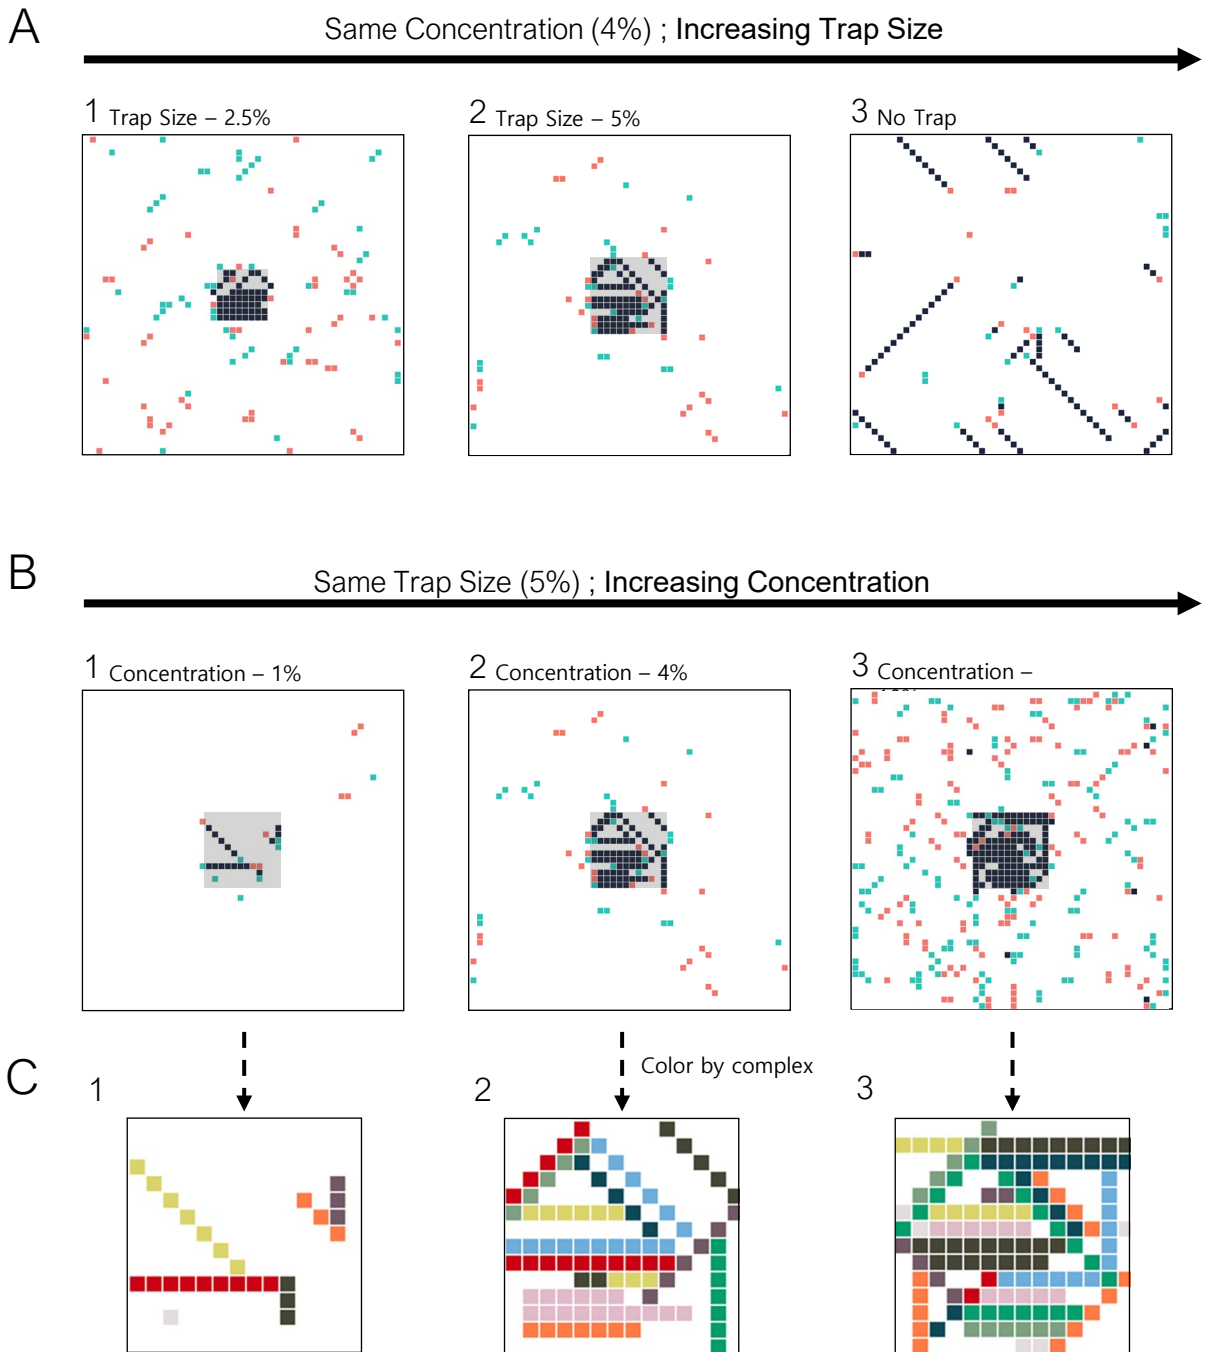

**SI Figure 4: cPcdhs zippers form 2D arrays that cluster at high protein concentration.** Simulation snapshots of the 2D lattice model with the same conditions as in Figure 3 except zippers assemblies cannot rotate. The snapshot represents how diffusion trap size (panel A) and concentration (panel B) influence zipper formation and clustering. C) Magnification of the diffusion trap area (grey area) in B. Each zipper-like assembly is depicted by a different color.

SI Figure 5

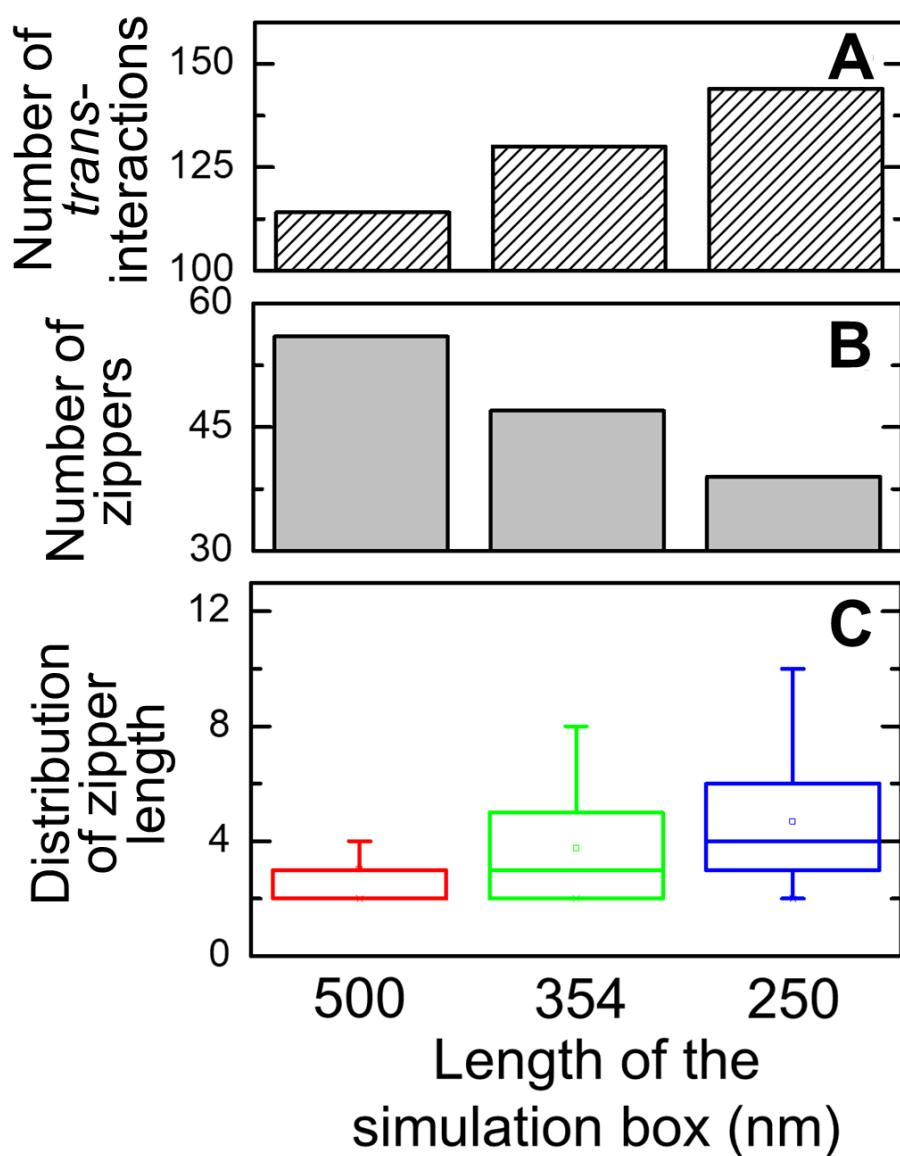

**SI Figure 5:** The kinetic MC simulations were carried out under different surface concentrations. The dependence of total number of *trans* interactions and total number of zippers on the length of simulation box are plotted in A and B, respectively. The distributions of zipper length under different concentrations are further shown in C as a box-whisker plot. The box of each distribution in the plot includes the 25–75 percentile range for the zipper length formed in each system, while their average number is marked in the middle of the corresponding box. The whisker indicates the outlier of the distribution with the coefficient equal to 1.5.

### SI Table 1

|   | Simulation    | Variable            | Values used                                                                                                                                                                        | Explanation                                                                                                                                                                                                                                                                                                                                 |
|---|---------------|---------------------|------------------------------------------------------------------------------------------------------------------------------------------------------------------------------------|---------------------------------------------------------------------------------------------------------------------------------------------------------------------------------------------------------------------------------------------------------------------------------------------------------------------------------------------|
| 1 | Lattice-based | Concentration       | 1%, 4%, 10%                                                                                                                                                                        | From previous studies on classical cadherins, the number of classical cadherins cell surfaces ranges between 25,000– 250,000 (7, 42). Since no such information is available regarding the expression level of cPcdhs we used 1%, 4% and 10% concentration corresponding approximately to this range.                                       |
| 2 |               | $\Delta G_D(trans)$ | 0kT – 8kT                                                                                                                                                                          | <i>Trans</i> binding free energies in solution of classical cadherins range from 20-170 $\mu$ M (41). These values correspond to $\Delta G_D$ values of around 6.7-7.7kT in 2D (7, 41). Since cPcdhs in solution have <i>trans</i> binding free energies of 2-150 $\mu$ M (24, 26, 30, 31), we used a similar range of $\Delta G_D$ values. |
| 3 |               | $\Delta G_D(cis)$   | 0kT – 8kT                                                                                                                                                                          | cPcdhs <i>cis</i> binding affinities are similar to the <i>trans</i> binding affinities and are around 9-80 $\mu$ M (24, 27, 30) in solution. We therefore use similar values as used for <i>trans</i> interactions.                                                                                                                        |
| 4 |               | Contact area        | 100%, 5%, 2.5%                                                                                                                                                                     | Since the contact area between two membranes is limited and leads to a high concentration of interacting proteins, we tested both full-membrane contact and two limited areas to understand the effect of this phenomenon.                                                                                                                  |
| 5 | Domain-based  | Concentration       | 200 <i>cis</i> -dimers on a surface of dimension 500nm $\times$ 500nm                                                                                                              | This is equivalent to 800 <i>cis</i> -dimers per $\mu$ m <sup>2</sup> corresponding roughly to concentrations between 1% and 4% used in the lattice-based simulations.                                                                                                                                                                      |
| 6 |               | $\Delta G_D(trans)$ | The association rate of the <i>trans</i> interactions was fixed at 10 ns <sup>-1</sup> , while the dissociation rate varied from 0.003ns <sup>-1</sup> to 0.000001ns <sup>-1</sup> | These values correspond to 2D $K_D$ s ranging from 3x10 <sup>-4</sup> to 10 <sup>-7</sup> corresponding to 2D affinities, $\Delta G_D(trans)$ , of 3.5kT – 7kT.                                                                                                                                                                             |
| 7 |               | $\Delta G_D(cis)$   | NA                                                                                                                                                                                 | For computational efficiency we assumed that all cPcdhs are in <i>cis</i> dimers.                                                                                                                                                                                                                                                           |
| 8 |               | Contact area        | Grow dynamically over the course of simulations                                                                                                                                    | We created a circular zone in the center of the simulation box. The radius of the contact area was initially set to 0 and increased linearly with the simulation time, mimicking the growth of the contact area between two cells driven by the formation of <i>trans</i> interactions                                                      |
